# Supplementary material for: Trypanosoma equiperdum Low Molecular Weight Proteins As Candidates for Specific Serological Diagnosis of Dourine
Source: Front Vet Sci. 2018 Mar 5;5:40. doi: 10.3389/fvets.2018.00040 (PMC5844913; doi:10.3389/fvets.2018.00040)
Supplement: Table S2 — Identified Trypanosoma equiperdum proteins listed according to their amino-acid sequence conservation (100% coverage/100% similarity) with all known proteins within the Trypanosoma genus. Proteins listed in bold type resulted unique for T. equiperdum; among unique proteins, those underlined have molecular weight <37 kDa. [file Table_2.xls]

## Sheet: TABLE 3
Protein number	Protein accession number	Protein name	Gene ontology	TMHMM (number) 1	Sequence conservation: species with identical protein (100% coverage – 100% similarity) 2	Sequence conservation: species with identical protein (90% coverage – 90% similarity) 2	B cell epitopes (number)	B cell epitopes (%)	Signal peptide 3
1	SCU66692.1	60S ribosomal protein L9	structural constituent of ribosome	0	-	-	1	2.6	-
2	SCU67526.1	Uncharacterized protein		0	-	-	4	20.1	-
3	SCU67064.1	40S ribosomal protein S6	structural constituent of ribosome	0	-	-	5	19.6	-
4	SCU66719.1	Translation elongation factor 1-beta	translation elongation factor activity	0	-	-	6	36.3	-
5	SCU71330.1	Sucrase/ferredoxin-like		0	-	-	7	21.2	-
6	SCU69415.1	Heat shock 70 kDa protein		0	-	-	10	31.8	-
7	SCU68469.1	Peptidyl-prolyl cis-trans isomerase (PPIase) (EC 5.2.1.8)	protein folding	0	-	-	10	45.8	-
8	SCU70408.1	Variant surface glycoprotein (VSG, atypical)		0	-	-	13	41.5	Y
9	SCU68250.1	Uncharacterized protein		0	-	TRYB9	13	41.6	-
10	SCU69338.1	ATP synthase (EC 3.6.3.14)	proton-transporting ATPase activity	0	-	TRYB2,TRYB9	2	11.1	-
11	SCU70630.1	Microsomal signal peptidase 12 kDa subunit (SPC12)	integral component of membrane; peptidase activity	2	-	TRYB2,TRYB9	2	17.5	-
12	SCU71017.1	Nuclear transmembrane protein	integral component of membrane	6	-	TRYB2,TRYB9	3	14.8	-
13	SCU70457.1	Elongation of fatty acids protein (EC 2.3.1.199)	integral component of membrane; fatty acid biosynthetic process	5	-	TRYB2,TRYB9	3	17.7	-
14	SCU68274.1	Calpain-like protein		0	-	TRYB2,TRYB9	4	21.1	-
15	SCU66277.1	Ubiquinone biosynthesis protein COQ4 homolog, mitochondrial	extrinsic component of mitochondrial inner membrane; ubiquinone biosynthetic process	1	-	TRYB2,TRYB9	5	15.3	-
16	SCU70424.1	Transmembrane emp24 domain-containing protein	integral component of membrane; transport	2	-	TRYB2,TRYB9	5	19.4	Y
17	SCU67625.1	Ubiquitin-conjugating enzyme E2	ATP binding	0	-	TRYB2,TRYB9	5	30	-
18	SCU66039.1	ALBA-Domain Protein	cytoplasm; DNA binding; RNA binding	0	-	TRYB2,TRYB9	5	60.4	-
19	SCU67661.1	Small GTP-binding protein Rab28	GTP binding; GTPase activity	0	-	TRYB2,TRYB9	6	24.2	-
20	SCU66661.1	GrpE protein homolog	mitochondrial matrix; protein folding	0	-	TRYB2,TRYB9	6	32.9	-
21	SCU67727.1	Transport protein particle (TRAPP) component		0	-	TRYB2,TRYB9	6	36.5	-
22	SCU67836.1	Uncharacterized protein		0	-	TRYB2,TRYB9	6	42.7	-
23	SCU72349.1	BarP protein	integral component of membrane	1	-	TRYB2,TRYB9	7	24.5	Y
24	SCU69999.1	Rab-like 5, small G protein	GTP binding	0	-	TRYB2,TRYB9	9	36.5	-
25	SCU66549.1	Uncharacterized protein		0	-	TRYB2,TRYB9	12	41.7	-
26	SCU67525.1	Nucleolar protein		0	-	TRYB2,TRYB9	14	30.3	-
27	SCU65503.1	Rib72 protein-like protein	calcium ion binding	0	-	TRYB2,TRYB9	17	26.2	-
28	SCU67398.1	Dolicholphosphate-mannose synthase (EC 2.4.1.83)	integral component of membrane; glycosyltransferase activity	1	-	TRYBB,TRYB2,TRYB9	5	10.8	-
29	SCU71010.1	Proteasome activator protein pa26	proteasome activator complex	0	-	TRYB2,TRYB9, 9TRYP	5	23.4	-
30	SCU67614.1	Phosphotransferase (EC 2.7.1.-)	hexokinase activity; glycolytic process	0	-	TRYB2,TRYB9,9TRYP	10	15.3	-
31	SCU65585.1	ATP-dependent 6-phosphofructokinase (ATP-PFK) (EC 2.7.1.11)	fructose 6-phosphate metabolic process	0	-	TRYBB,TRYB2,TRYB9	10	19.9	-
32	SCU67058.1	Peroxin 14	peroxisomal membrane; protein import into peroxisome matrix, docking	0	-	TRYBB,TRYB2,TRYB9	10	55.7	-
33	SCU71848.1	Lysosomal/endosomal membrane protein p67	integral component of membrane	2	-	TRYBR,TRYB2,TRYB9	17	21	Y
34	SCU65896.1	Flagellar calcium-binding protein	motile cilium; calcium ion binding	0	-	TRYBB,TRYEV, TRYB2,TRYB9	7	31.2	-
35	SCU67572.1	Heat shock 70 kDa protein	ATP binding	0	-	TRYBB,TRYCC,TRYCI,TRYCR,TRYEV,TRYRA,TRYVY,TRYB2	17	30.7	-
36	SCU65320.1	Glyceraldehyde-3-phosphate dehydrogenase (EC 1.2.1.12)	glucose metabolic process; glycolytic process	0	-	TRYBB, TRYCC,TRYCI,TRYCO,TRYCR, TRYEV,TRYVI,TRYVY,9TRYP	8	14.8	-
37	SCU66935.1	Tubulin alpha chain	structural constituent of cytoskeleton	0	-	TRYBR, TRYCC, TRYCI,TRYCR,TRYRA,TRYVY, TRYB2,TRYB9, 9TRYP	11	23.5	-
38	SCU70603.1	Calpain-like cysteine peptidase		0	TRYB2	TRYB2	3	41.7	-
39	SCU70624.1	Uncharacterized protein	integral component of membrane	1	TRYB9	TRYB9	4	34.1	-
40	SCU71859.1	Replication Factor A 28 kDa subunit	nucleus; DNA binding, recombination, repair and replication	0	TRYB2	TRYB2	7	28.2	-
41	SCU65693.1	Paraflagellar Rod Proteome Component 9	motile cilium	0	TRYB2	TRYB2	8	75.2	-
42	SCU64684.1	COPI associated protein	integral component of membrane	4	TRYB2	TRYB2,TRYB9	1	18.2	-
43	SCU72471.1	Glucosidase II beta subunit-like protein		0	TRYB2	TRYB2,TRYB9	2	12.4	Y
44	SCU65310.1	FUN14 family	integral component of membrane	2	TRYB2	TRYB2,TRYB9	2	25.5	-
45	SCU64289.1	Uncharacterized protein	integral component of membrane	2	TRYB2	TRYB2,TRYB9	2	57	Y
46	SCU65530.1	SNARE associated Golgi protein	integral component of membrane	6	TRYB2	TRYB2,TRYB9	4	8.8	-
47	SCU66003.1	Pre-rRNA-processing protein PNO1	RNA binding	0	TRYB9	TRYB2,TRYB9	4	19.8	-
48	SCU71997.1	Adenosine 5'-monophosphoramidase	catalytic activity	0	TRYB2	TRYB2,TRYB9	4	19.9	-
49	SCU70240.1	Snf7	vacuolar transport	0	TRYB2	TRYB2,TRYB9	4	22.2	-
50	SCU71304.1	Kinetoplast DNA-associated protein		0	TRYB2	TRYB2,TRYB9	4	37.3	-
51	SCU71336.1	Vesicle-associated membrane protein	integral component of membrane; vesicle-mediated transport	1	TRYB2	TRYB2,TRYB9	5	14.6	-
52	SCU66915.1	Syntaxin	integral component of membrane	1	TRYB2	TRYB2,TRYB9	5	19.1	-
53	SCU70988.1	40S ribosomal protein S3a	structural constituent of ribosome	0	TRYB2	TRYB2,TRYB9	5	23	-
54	SCU71926.1	Uncharacterized protein	integral component of membrane	1	TRYB2	TRYB2,TRYB9	5	23.1	-
55	SCU72072.1	DUF2407 ubiquitin-like domain containing protein		0	TRYB2	TRYB2,TRYB9	5	40.9	-
56	SCU69787.1	1-acyl-sn-glycerol-3-phosphate acyltransferase (EC 2.3.1.51)	integral component of membrane; metabolic process	1	TRYB2	TRYB2,TRYB9	6	17.3	-
57	SCU71974.1	Adenine phosphoribosyltransferase (EC 2.4.2.7)	nucleoside metabolic process	0	TRYB2	TRYB2,TRYB9	6	19.6	-
58	SCU71429.1	EF hand	integral component of membrane; calcium ion binding	2	TRYB2	TRYB2,TRYB9	6	19.7	-
59	SCU67768.1	Ubiquitin carboxyl-terminal hydrolase (EC 3.4.19.12)	ubiquitin-dependent protein catabolic process	0	TRYB2	TRYB2,TRYB9	6	19.9	-
60	SCU65728.1	Adenylate kinase (EC 2.7.4.3)	ATP binding; adenylate kinase activity	0	TRYB9	TRYB2,TRYB9	6	20.7	-
61	SCU69739.1	Hypoxanthine-guanine phosphoribosyltransferase	transferase activity	0	TRYB2	TRYB2,TRYB9	6	23.9	-
62	SCU70900.1	Vesicle transport v-SNARE protein	integral component of membrane	1	TRYB2	TRYB2,TRYB9	7	24.8	-
63	SCU69743.1	Uncharacterized protein		0	TRYB2	TRYB2,TRYB9	7	25.3	-
64	SCU66963.1	Uncharacterized protein		0	TRYB2	TRYB2,TRYB9	7	54.4	-
65	SCU72688.1	Uncharacterized protein	catalytic activity	0	TRYB2	TRYB2,TRYB9	8	23.6	Y
66	SCU67413.1	Stress-inducible protein STI1-like		0	TRYB2	TRYB2,TRYB9	8	26.5	-
67	SCU65865.1	Radial spoke protein RSP9		0	TRYB2	TRYB2,TRYB9	8	30.3	-
68	SCU66393.1	Uncharacterized protein		0	TRYB2	TRYB2,TRYB9	8	31.2	Y
69	SCU70363.1	RNA-binding protein	nucleic acid binding	0	TRYB2	TRYB2,TRYB9	8	38.7	-
70	SCU65553.1	Elongation factor 1 gamma	translation elongation factor activity	0	TRYB9	TRYB2,TRYB9	9	26.7	-
71	SCU65905.1	Uncharacterized protein		0	TRYB2	TRYB2,TRYB9	9	34.3	-
72	SCU66550.1	Uncharacterized protein		0	TRYB2	TRYB2,TRYB9	12	48.1	-
73	SCU66500.1	Inosine-5'-monophosphate dehydrogenase (IMPDH) (EC 1.1.1.205)	cytoplasm; GMP biosynthetic process	0	TRYB9	TRYBB,TRYB9	13	17.2	-
74	SCU69760.1	Intraflagellar transport protein 57/55	motile cilium	0	TRYB2	TRYB2,TRYB9	13	36.8	-
75	SCU68395.1	The ARF-like 2 binding protein BART		0	TRYB2	TRYB2,TRYB9	14	38.3	-
76	SCU69099.1	C2 domain containing protein		0	TRYB2	TRYB2,TRYB9	23	28.7	-
77	SCU69494.1	T-complex protein 10 C-terminus		0	TRYB2	TRYB2,TRYB9	32	52.8	-
78	SCU69640.1	Nucleoside diphosphate kinase (EC 2.7.4.6)	CTP, GTP and UTP biosynthetic processes	0	TRYB2	TRYB2, TRYB9, 9TRYP	3	14.4	-
79	SCU68044.1	40S ribosomal protein S8	structural constituent of ribosome	0	TRYB9	TRYCI,TRYB2,TRYB9	4	24.5	-
80	SCU68699.1	Peroxisomal biogenesis factor 11 (PEX11)	integral component of peroxisomal membrane; peroxisome fission	1	TRYB2	TRYBB,TRYB2, TRYB9	5	17.8	-
81	SCU71733.1	Ribosomal protein L31e	structural constituent of ribosome	0	TRYB2	TRYCI,TRYB2,TRYB9	5	24.5	-
82	SCU72944.1	40S ribosomal protein S4	structural constituent of ribosome	0	TRYB2	TRYCI,TRYB2,TRYB9	6	19	-
83	SCU64241.1	Ras-related protein Rab5A	GTP binding; GTPase activity	0	TRYB2	TRYBR,TRYB2, TRYB9	6	36.1	-
84	SCU68257.1	60S ribosomal protein L4	structural constituent of ribosome	0	TRYB2	TRYBB,TRYB2, TRYB9	9	21.4	-
85	SCU69500.1	T-complex protein 1, zeta subunit	cytoplasm; protein folding	0	TRYB2	TRYCI,TRYB2,TRYB9	14	15.4	-
86	SCU67019.1	60S ribosomal protein L27	ribosome; structural constituent of ribosome; translation	0	TRYB2	TRYCC, TRYCI, TRYCR, TRYB2	2	13.5	-
87	SCU65547.1	Ubiquitin-2 like Rad60 SUMO-like/Ubiquitin family/Ubiquitin-like domain/Ribosomal L40e family	ribosome; structural constituent of ribosome; translation	0	TRYBB	TRYBB, TRYCR, TRYRA, TRYVY, 9TRYP	2	11.7	-
88	SCU73112.1	Glycerol-3-phosphate dehydrogenase [NAD(+)] (EC 1.1.1.8)	protein homodimerization activity; carbohydrate metabolic process	0	TRYB2	TRYBB, TRYBR, TRYCI, TRYB2, TRYB9	4	7.3	-
89	SCU70474.1	60S ribosomal protein L11	ribosome; structural constituent of ribosome; translation	0	TRYB2	TRYCC, TRYCI, TRYVY, TRYB2, TRYB9	4	13.4	-
90	SCU70351.1	Uncharacterized protein		0	TRYB2,TRYB9	TRYB2,TRYB9	2	17.1	-
91	SCU68392.1	Histone H4	nucleus; DNA binding; protein heterodimerization activity	0	TRYB2,TRYB9	TRYB2,TRYB9	2	21	-
92	SCU69761.1	Paraflagellar rod component	motile cilium	0	TRYB2,TRYB9	TRYB2,TRYB9	3	24.6	-
93	SCU67128.1	Paraflagellar rod component	motile cilium	0	TRYB2,TRYB9	TRYB2,TRYB9	4	11.2	-
94	SCU66360.1	Dynein light chain p28, axonemal		0	TRYB2,TRYB9	TRYB2,TRYB9	4	14.5	-
95	SCU68835.1	Uncharacterized protein		0	TRYB2,TRYB9	TRYB2,TRYB9	4	21.6	-
96	SCU66969.1	Uncharacterized protein		0	TRYB2,TRYB9	TRYB2,TRYB9	4	22.6	-
97	SCU66867.1	Uncharacterized protein		0	TRYB2,TRYB9	TRYB2,TRYB9	4	24.8	-
98	SCU67279.1	Conserved protein		0	TRYB2,TRYB9	TRYB2,TRYB9	4	30.6	-
99	SCU71298.1	Kinetoplast DNA-associated protein		0	TRYB2,TRYB9	TRYB2,TRYB9	4	37.8	-
100	SCU70021.1	ALBA-Domain Protein	nucleic acid binding	0	TRYB2,TRYB9	TRYB2,TRYB9	4	41.6	-
101	SCU65429.1	40S ribosomal protein S10	ribosome	0	TRYB2,TRYB9	TRYB2,TRYB9	4	48.8	-
102	SCU70710.1	Uncharacterized protein		0	TRYB2,TRYB9	TRYB2,TRYB9	4	83.2	-
103	SCU72129.1	3-oxo-5-alpha-steroid 4-dehydrogenase (EC 1.3.99.5)	integral component of membrane; cytoplasm; lipid metabolic process	4	TRYB2,TRYB9	TRYB2,TRYB9	5	15.4	-
104	SCU69146.1	Uracil phosphoribosyltransferase (EC 2.4.2.9)	nucleoside metabolic process	0	TRYB2,TRYB9	TRYB2,TRYB9	5	17.9	-
105	SCU71518.1	Signal peptidase subunit	integral component of membrane; peptidase activity; signal peptide processing	1	TRYB2,TRYB9	TRYB2,TRYB9	5	19.1	-
106	SCU70087.1	ATP synthase delta (OSCP) subunit	proton-transporting ATP synthase activity, rotational mechanism	0	TRYB2,TRYB9	TRYB2,TRYB9	5	22.7	-
107	SCU68054.1	Ribosomal protein S19	structural constituent of ribosome	0	TRYB2,TRYB9	TRYB2,TRYB9	5	24	-
108	SCU69493.1	Ubiquitin-conjugating enzyme		0	TRYB2,TRYB9	TRYB2,TRYB9	5	34.1	-
109	SCU70752.1	40S ribosomal protein S21	structural constituent of ribosome	0	TRYB2,TRYB9	TRYB2,TRYB9	5	61.7	-
110	SCU69758.1	EF-hand domain pair	calcium ion binding	0	TRYB2,TRYB9	TRYB2,TRYB9	6	21.9	-
111	SCU68398.1	Translation elongation factor 1-beta	translation elongation factor activity	0	TRYB2,TRYB9	TRYB2,TRYB9	6	29.4	-
112	SCU65182.1	Clathrin light chain	structural molecule activity; intracellular protein transport; vesicle-mediated transport	0	TRYB2,TRYB9	TRYB2,TRYB9	6	61.4	-
113	SCU68183.1	Alanine racemase (EC 5.1.1.1)	alanine racemase activity	0	TRYB2,TRYB9	TRYB2,TRYB9	7	25.3	-
114	SCU65509.1	Uncharacterized protein		1	TRYB2,TRYB9	TRYB2,TRYB9	7	29.9	-
115	SCU69752.1	60S ribosomal protein L6	structural constituent of ribosome	0	TRYB2,TRYB9	TRYB2,TRYB9	7	42.7	-
116	SCU66311.1	MSP (Major sperm protein) domain containing protein	integral component of membrane; endoplasmic reticulum membrane	1	TRYB2,TRYB9	TRYB2,TRYB9	8	31.9	-
117	SCU65589.1	60S ribosomal protein L13	structural constituent of ribosome	0	TRYB2,TRYB9	TRYB2,TRYB9	8	40.8	-
118	SCU68842.1	Tyrosyl/methionyl-tRNA synthetase (EC 6.1.1.-)	aminoacyl-tRNA ligase activity; tRNA binding	0	TRYB2,TRYB9	TRYB2,TRYB9	9	38.6	-
119	SCU70440.1	Uncharacterized protein		0	TRYB2,TRYB9	TRYB2,TRYB9	9	39.8	-
120	SCU71349.1	Uncharacterized protein		0	TRYB2,TRYB9	TRYB2,TRYB9	20	22.5	-
121	SCU69362.1	40S ribosomal protein S16	structural constituent of ribosome	0	TRYB2,TRYB9	TRYCI,TRYB2,TRYB9	3	14.1	-
122	SCU72476.1	Proteasome subunit alpha type (EC 3.4.25.1)	cytoplasm; nucleus; ubiquitin-dependent protein catabolic process	0	TRYB2,TRYB9	TRYBB,TRYB2,TRYB9	5	12.4	-
123	SCU68569.1	40S ribosomal protein SA	structural constituent of ribosome	0	TRYB2,TRYB9	TRYCC,TRYB2,TRYB9	6	25.4	-
124	SCU69109.1	60S ribosomal protein L35a	structural constituent of ribosome	0	TRYB2,TRYB9	TRYCI,TRYB2,TRYB9	6	26.2	-
125	SCU68243.1	40S ribosomal protein S2	structural constituent of ribosome	0	TRYB2,TRYB9	TRYCI,TRYB2,TRYB9	7	32.3	-
126	SCU66952.1	RNA-binding protein	nucleic acid binding; zinc ion binding	0	TRYB2,TRYB9	TRYBB,TRYB2,TRYB9	10	51.2	-
127	SCU69918.1	40S ribosomal protein S25	ribosome	0	TRYB2,TRYB9	TRYCI, TRYVY, TRYB2, TRYB9	2	32.7	-
128	SCU66577.1	Ribosomal protein L36	structural constituent of ribosome	0	TRYB2,TRYB9	TRYCC,TRYCI,TRYB2,TRYB9	3	28.4	-
129	SCU71167.1	40S ribosomal protein S26	structural constituent of ribosome	0	TRYB2,TRYB9	TRYRA,TRYVY,TRYB2,TRYB9	4	30.6	-
130	SCU71696.1	TAX-2		0	TRYB2,TRYB9	TRYCI, TRYVY, TRYB2, TRYB9	5	15.5	-
131	SCU66359.1	Triosephosphate isomerase (EC 5.3.1.1)	gluconeogenesis; glycolytic process	0	TRYB2,TRYB9	TRYBB, TRYCI, TRYB2, TRYB9	6	15.6	-
132	SCU71971.1	60S ribosomal protein L7	ribosome	0	TRYB2,TRYB9	TRYCI, TRYRA, TRYB2, TRYB9	6	17.4	-
133	SCU71618.1	Fructose-bisphosphate aldolase (EC 4.1.2.13)	glycolytic process	0	TRYB2,TRYB9	TRYBB, TRYCI, TRYB2, TRYB9	8	17.5	-
134	SCU69451.1	Ribosomal protein L37	structural constituent of ribosome	0	TRYB2,TRYB9	TRYCC, TRYRA, TRYVY, TRYB2, TRYB9	2	17.9	-
135	SCU65431.1	40S ribosomal protein S18	structural constituent of ribosome	0	TRYB2,TRYB9	TRYCC, TRYCI, TRYVY, TRYB2, TRYB9	3	20.3	-
136	SCU70738.1	60S ribosomal protein L24	ribosome	0	TRYB2,TRYB9	TRYCI, TRYRA, TRYVY, TRYB2, TRYB9	3	23	-
137	SCU66429.1	60S ribosomal protein L17	structural constituent of ribosome	0	TRYB2,TRYB9	TRYCC ,TRYCI, TRYRA, TRYB2, TRYB9	5	33.1	-
138	SCU67059.1	Proteasome subunit alpha type (EC 3.4.25.1)	cytoplasm; nucleus; proteasome-mediated ubiquitin-dependent protein catabolic process	0	TRYBB,TRYB2	TRYBB, TRYCI, TRYRA, TRYB2,TRYB9	7	27.2	-
139	SCU73202.1	Chaperonin HSP60, mitochondrial	cytoplasm; protein refolding	0	TRYB2,TRYB9	TRYBB, TRYCI, TRYVY, TRYB2, TRYB9	16	23.3	-
140	SCU64272.1	40S ribosomal protein S15A	structural constituent of ribosome	0	TRYB2,TRYB9	TRYCC ,TRYCR, TRYRA, TRYVY, TRYB2, TRYB9	1	5.4	-
141	SCU70353.1	40S ribosomal protein S3	structural constituent of ribosome	0	TRYB2,TRYB9	TRYCC, TRYCI, TRYCR, TRYVY, TRYB2, TRYB9	3	7	-
142	SCU70997.1	60S ribosomal protein L18a	structural constituent of ribosome	0	TRYB2,TRYB9	TRYCC, TRYCI, TRYRA, TRYVY, TRYB2, TRYB9	3	12.3	-
143	SCU70732.1	40S ribosomal protein S5	structural constituent of ribosome	0	TRYB2,TRYB9	TRYCC, TRYCI, TRYCR, TRYRA, TRYVY, TRYB2, TRYB9	5	25.3	-
144	SCU72206.1	ATP-dependent DEAD box helicase	helicase activity; nucleic acid binding	0	TRYB2,TRYB9	TRYCC, TRYCI ,TRYCR, TRYRA, TRYVY, TRYB2, TRYB9	7	14.9	-
145	SCU69943.1	GTP-binding nuclear protein	intracellular protein transport; signal transduction	0	TRYB2,TRYB9	TRYCC, TRYCI ,TRYCR, TRYVY, TRYB2, TRYB9, 9TRYP	7	21.7	-
146	SCU67607.1	Elongation factor 1-alpha	cytoplasm; translation elongation factor activity	0	TRYB2,TRYB9	TRYBB, TRYCI, TRYCR, TRYRA, TRYVY, TRYB2, TRYB9	14	27.2	-
147	SCU64703.1	Actin A	ATP binding	0	TRYB2,TRYB9	TRYBB, TRYCC, TRYCI, TRYCR, TRYEV, TRYRA, TRYVY, TRYB2, TRYB9	11	26.1	-
148	SCU69697.1	Heat shock 70 kDa protein	ATP binding	0	TRYB2,TRYB9	TRYCC, TRYCI, TRYCO, TRYCR, TRYRA, TRYVY, TRYB2, TRYB9, 9TRYP	22	29.7	Y
149	SCU66076.1	Tryparedoxin 1a	cell redox homeostasis	0	TRYBB, TRYB2, TRYB9	TRYBB, TRYB2, TRYB9	2	13.9	-
150	SCU66306.1	Mitochondrial RNA binding protein 2	regulation of transcription	0	TRYB2, TRYB9, 9TRYP	TRYB2, TRYB9, 9TRYP	5	29.9	-
151	SCU70884.1	Small GTPase	GTPase activity	0	TRYBB, TRYB2, TRYB9	TRYBB, TRYB2, TRYB9	7	24.5	-
152	SCU66171.1	Proteasome endopeptidase complex (EC 3.4.25.1)	cytoplasm; nucleus; ubiquitin-dependent protein catabolic process	0	TRYB2, TRYB9, 9TRYP	TRYB2, TRYB9, 9TRYP	7	27	-
153	SCU71781.1	Proteasome subunit beta type (EC 3.4.25.1)	cytoplasm; nucleus; proteolysis involved in cellular protein catabolic process	0	TRYBR, TRYB2, TRYB9	TRYBR, TRYB2,TRYB9	11	34	-
154	SCU70870.1	Polyadenylate-binding protein (PABP)	cytoplasm; RNA binding	0	TRYB2, TRYB9, 9TRYP	TRYB2, TRYB9, 9TRYP	17	30.8	-
155	SCU66886.1	60S ribosomal protein L23a	structural constituent of ribosome	0	TRYBB, TRYB2, TRYB9	TRYBB, TRYVY, TRYB2, TRYB9	4	40.2	-
156	SCU70973.1	60S ribosomal protein L30	structural constituent of ribosome	0	TRYBB, TRYB2, TRYB9	TRYBB, TRYCC, TRYRA, TRYVY, TRYB2, TRYB9	1	8.6	-
157	SCU72154.1	40S ribosomal protein S23	structural constituent of ribosome	0	TRYCI, TRYB2, TRYB9	TRYCC, TRYCI, TRYRA, TRYVY, TRYB2, TRYB9	6	30.8	-
158	SCU68947.1	40S ribosomal protein S9	structural constituent of ribosome	0	TRYBB, TRYB2, TRYB9	TRYBB, TRYCC, TRYCI, TRYRA, TRYVY, TRYB2, TRYB9	4	20	-
159	SCU66671.1	40S ribosomal protein S14	structural constituent of ribosome	0	TRYBB, TRYB2, TRYB9	TRYBB, TRYCC, TRYCI, TRYRA, TRYVY, TRYB2, TRYB9	4	35.4	-
160	SCU72227.1	60S ribosomal protein L10	structural constituent of ribosome	0	TRYB2, TRYB9, 9TRYP	TRYCC, TRYCI, TRYCR, TRYVY, TRYB2 ,TRYB9, 9TRYP	5	14.1	-
161	SCU69307.1	Tubulin alpha chain	structural constituent of ribosome	0	TRYBR, TRYB2, TRYB9	TRYBR, TRYCC, TRYCI, TRYCR, TRYRA, TRYVY, TRYB2, TRYB9	2	9.8	-
162	SCU66468.1	Paraflagellar rod protein 2-5	motile cilium; calmodulin binding	0	TRYEV, TRYB2, TRYB9	TRYBB, TRYCC, TRYCR, TRYEV, TRYRA, TRYVY, TRYB2, TRYB9	13	22.8	-
163	SCU66934.1	Tubulin beta chain	structural constituent of cytoskeleton	0	TRYBR, TRYB2, TRYB9	TRYBR, TRYCC, TRYCI, TRYCR, TRYEV, TRYRA, TRYVY, TRYB2, TRYB9, 9TRYP	14	27.4	-
164	SCU67575.1	Receptor for activated C kinase 1	kinase activity	0	TRYBB, TRYBR, TRYB2,TRYB9	TRYBB, TRYBR, TRYB2, TRYB9	6	22.6	-
165	SCU71559.1	Paraflagellar rod protein 2-5	motile cilium; calmodulin binding	0	TRYBB, TRYEV, TRYB2, TRYB9	TRYBB, TRYCC, TRYCI, TRYCR, TRYEV, TRYVY, TRYB2, TRYB9	15	20.5	-
166	SCU67783.1	Glycerol kinase, glycosomal (EC 2.7.1.30)	carbohydrate metabolic process	0	TRYBB, TRYBG, TRYBR, TRYB2, TRYB9	TRYBB, TRYBR, TRYBG, TRYB2, TRYB9	11	15.6	-
167	SCU68804.1	Alternative oxidase (EC 1.-.-.-)	integral component of membrane; respiratory chain	1	TRYBB, TRYBG, TRYBR, TRYEV ,TRYB2 ,TRYB9	TRYBB, TRYBG, TRYBR, TRYEV, TRYB2, TRYB9	5	20.7	-
		TABLE FOOTNOTES
		1 TMHMM = number of predicted transmembrane helices
		2 TRYB2 = Trypanosoma brucei brucei (strain 927/4 GUTat10.1)
		TRYB9 = Trypanosoma brucei gambiense (strain MHOM/CI/86/DAL972)
		TRYBB = Trypanosoma brucei brucei
		TRYBG = Trypanosoma brucei rhodesiense
		TRYBR = Trypanosoma brucei gambiense
		TRYCI = Trypanosoma congolense (strain IL3000)
		TRYCC = Trypanosoma cruzi (strain CL Brener)
		TRYCO = Trypanosoma congolense
		TRYCR = Trypanosoma cruzi
		TRYEV = Trypanosoma evansi
		TRYRA = Trypanosoma rangeli
		TRYVI = Trypanosoma vivax
		TRYVY = Trypanosoma vivax (strain Y486)
		10TRYP = Trypanosomatidae
		3 Y = presence of signal peptide
